# Supplementary figures and images for: Synaptotagmin-7 places dense-core vesicles at the cell membrane to promote Munc13-2- and Ca2+-dependent priming
Source: eLife journal article supplement (doi:10.7554/elife.64527), 2021-03-22

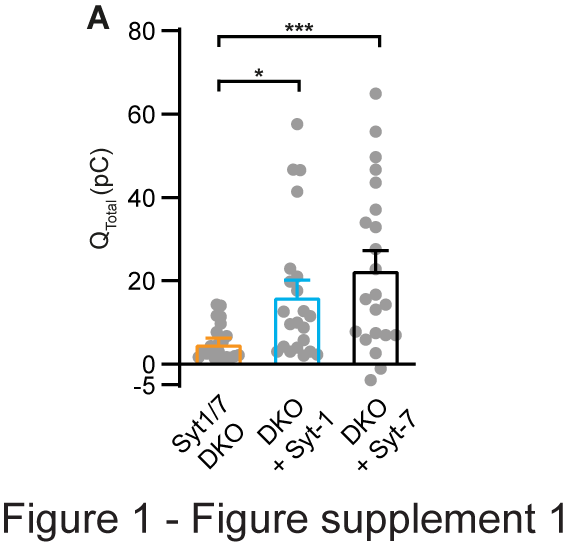

Supplement: supp [file elife-64527-supp-v1.zip › elife_poa_e64527_Figure_1_figure_supplement_1.tif]

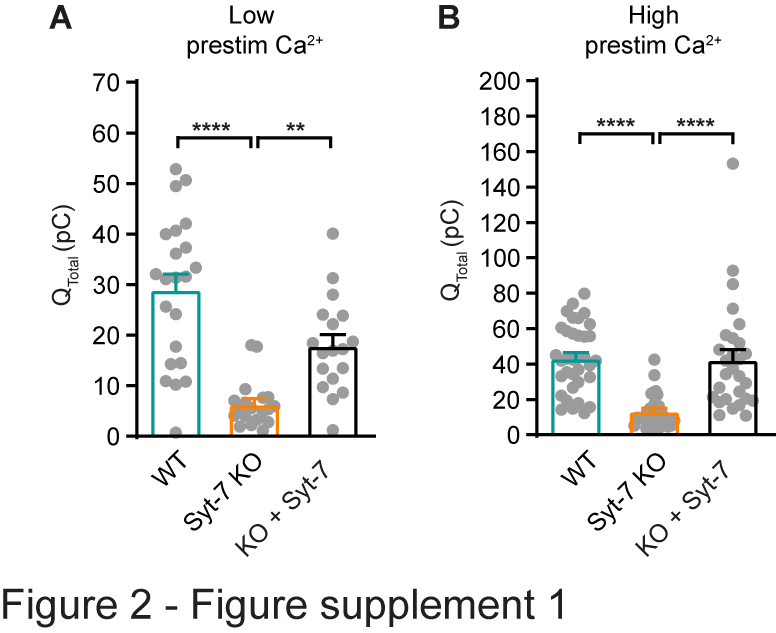

Supplement: supp [file elife-64527-supp-v1.zip › elife_poa_e64527_Figure_2_figure_supplement_1.tif]

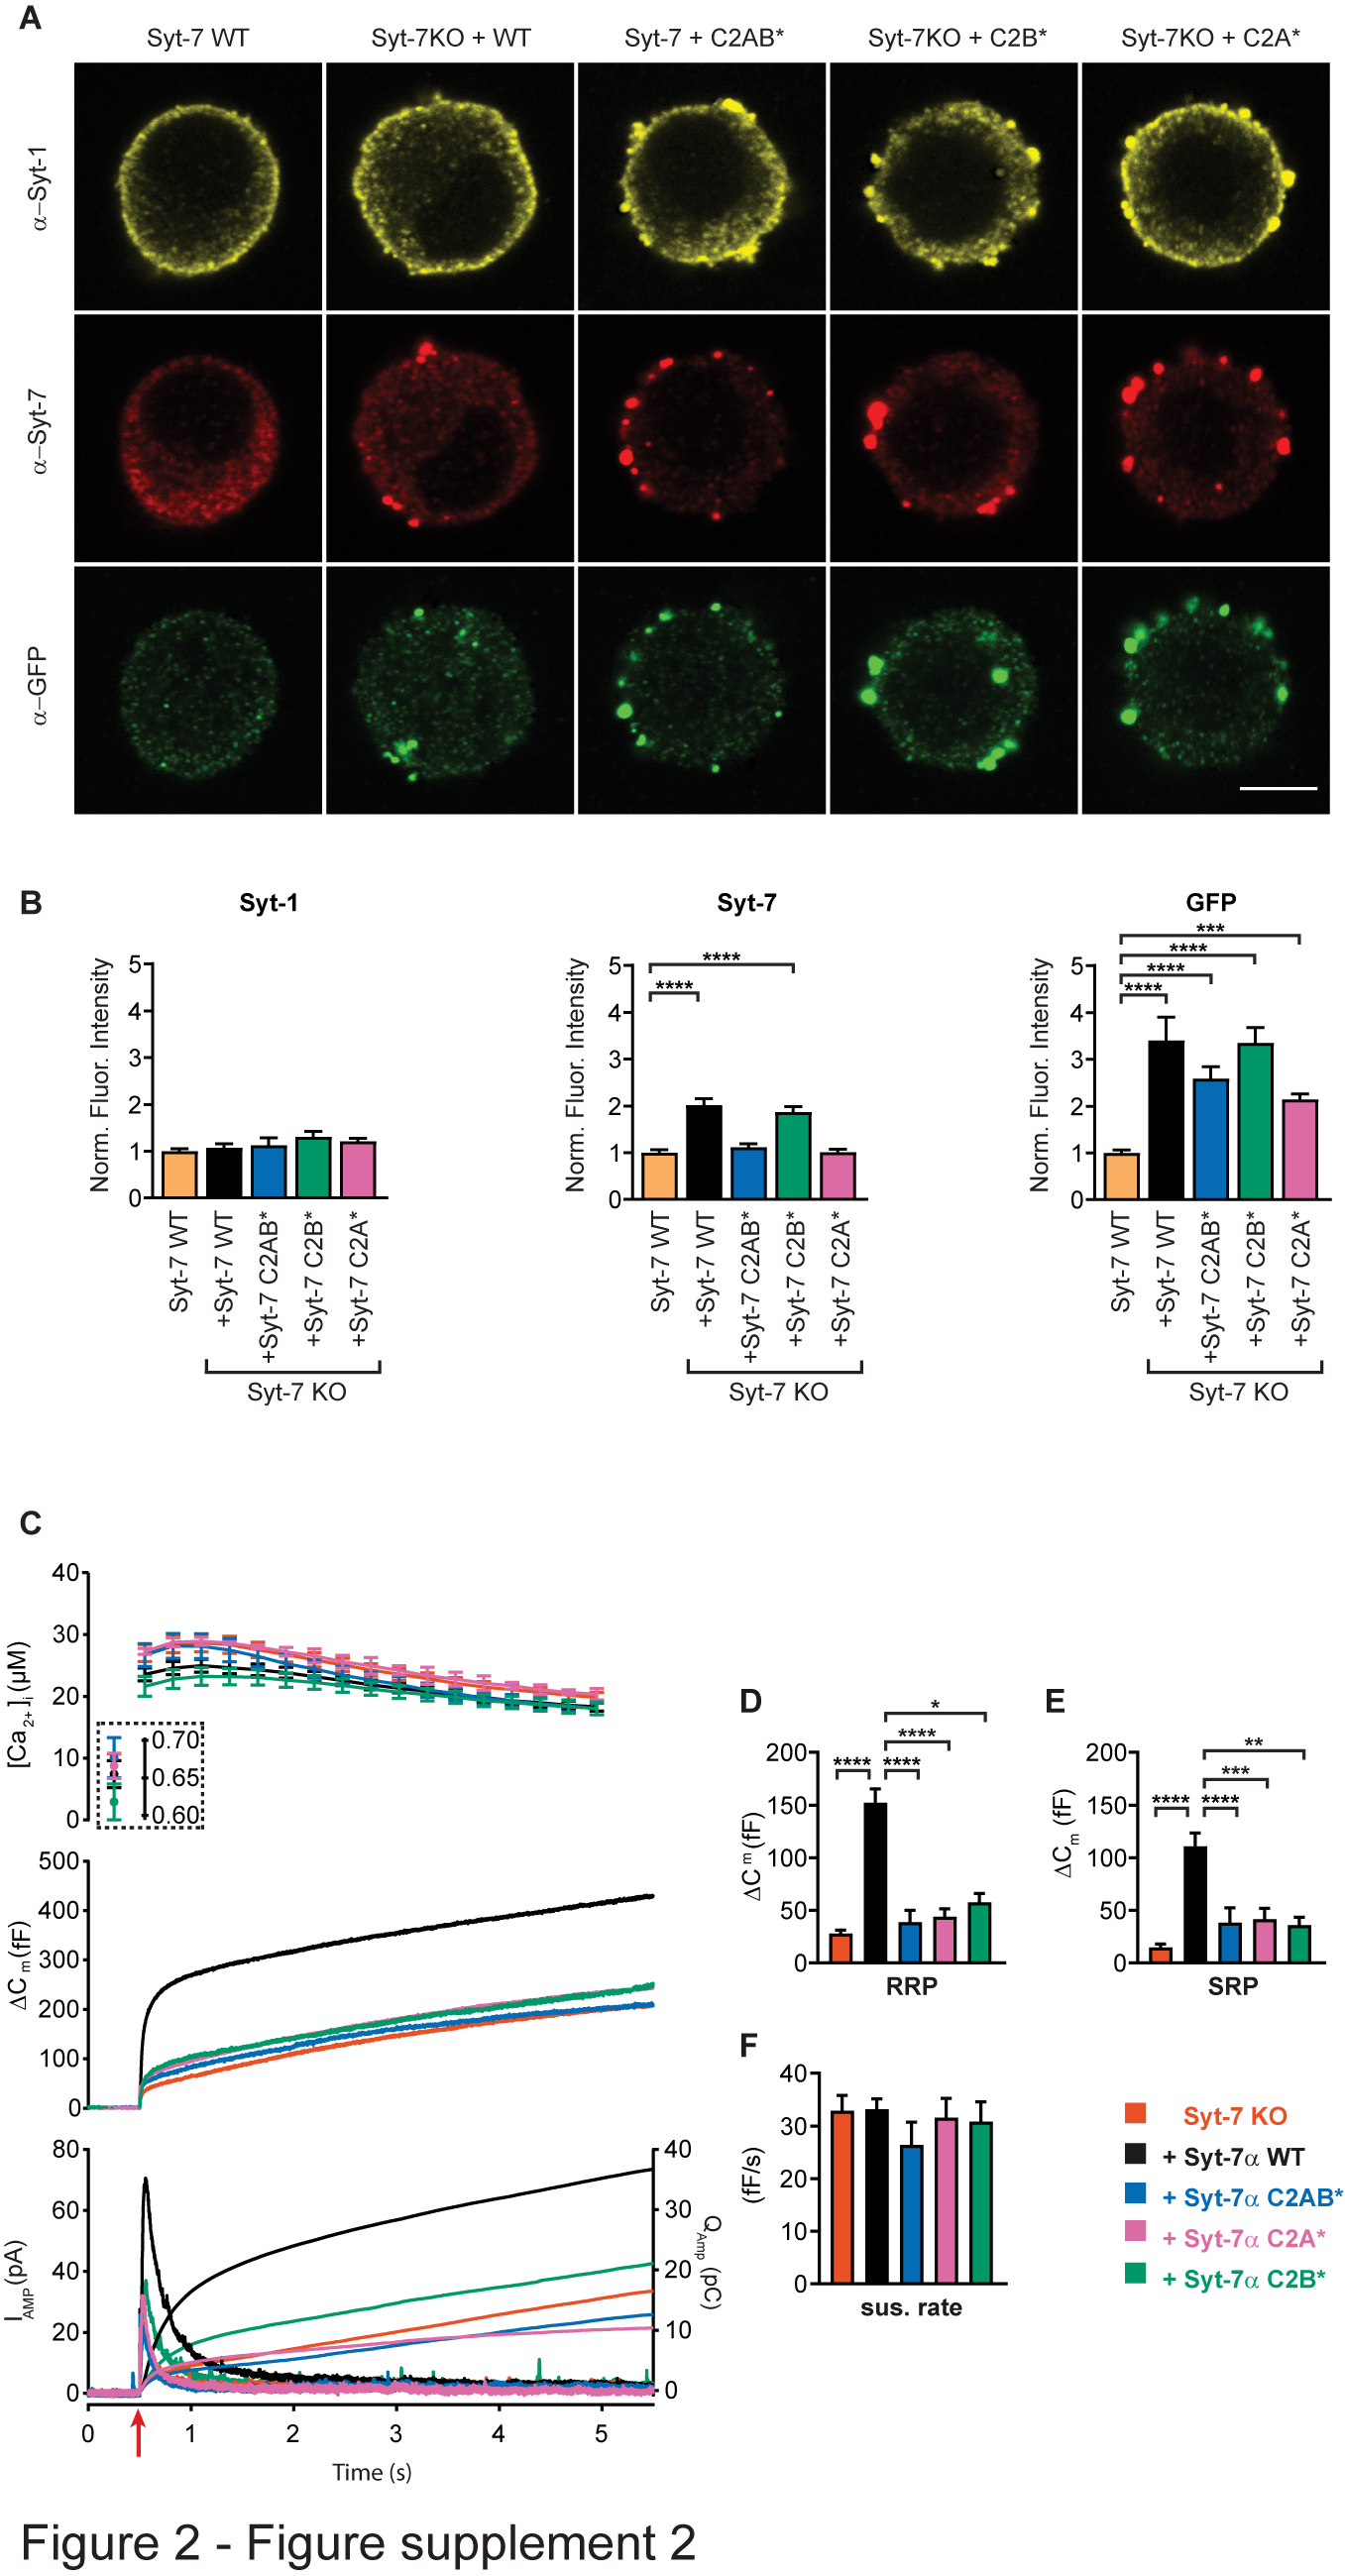

Supplement: supp [file elife-64527-supp-v1.zip › elife_poa_e64527_Figure_1_figure_supplement_2.tif]

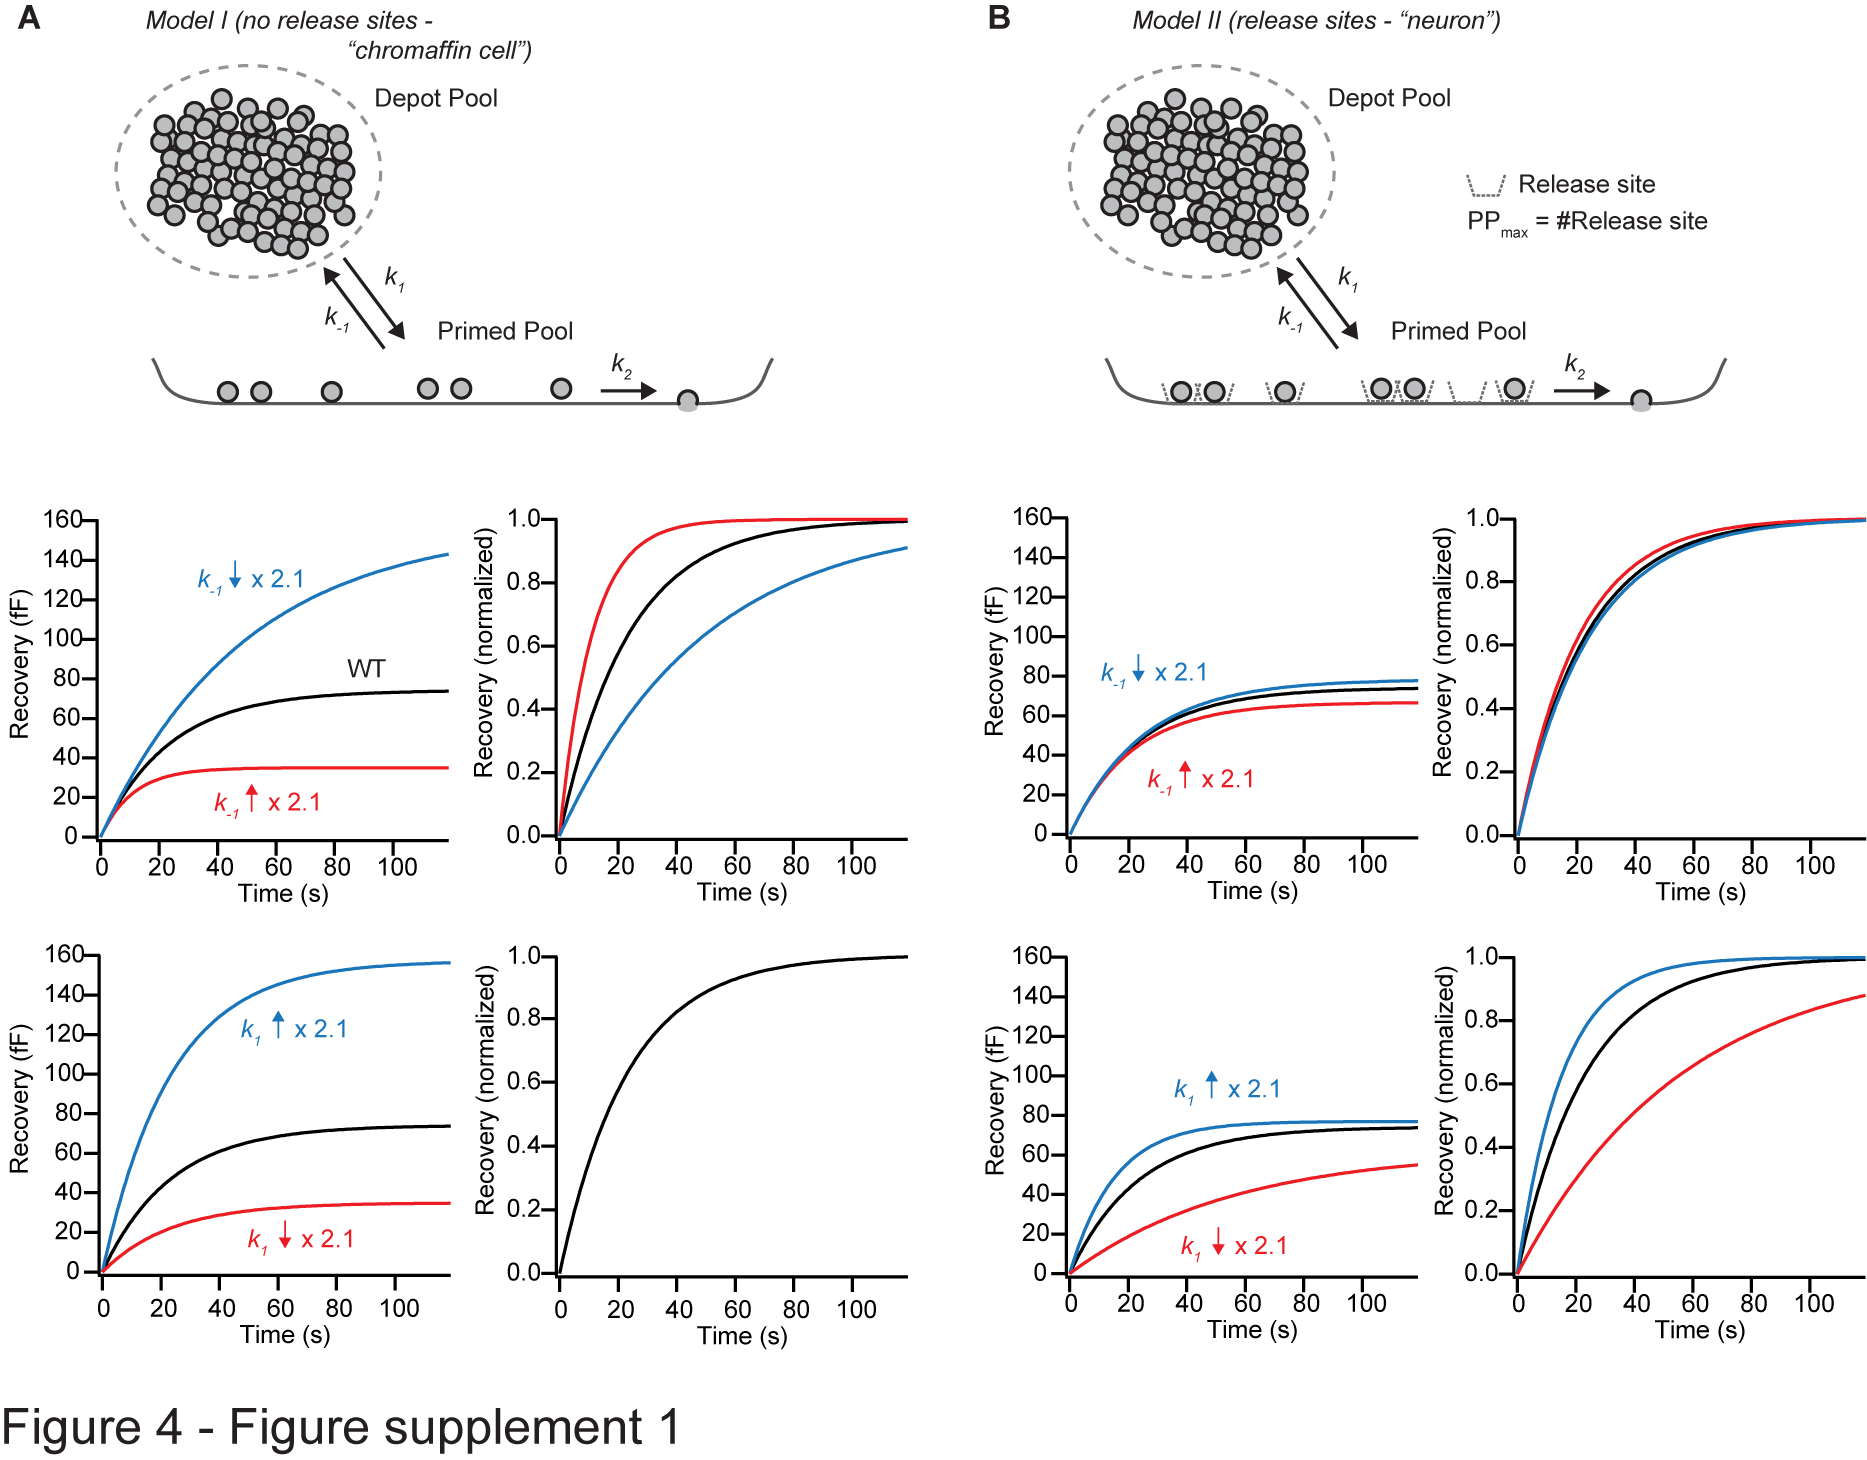

Supplement: supp [file elife-64527-supp-v1.zip › elife_poa_e64527_Figure_4_figure_supplement_1.tif]

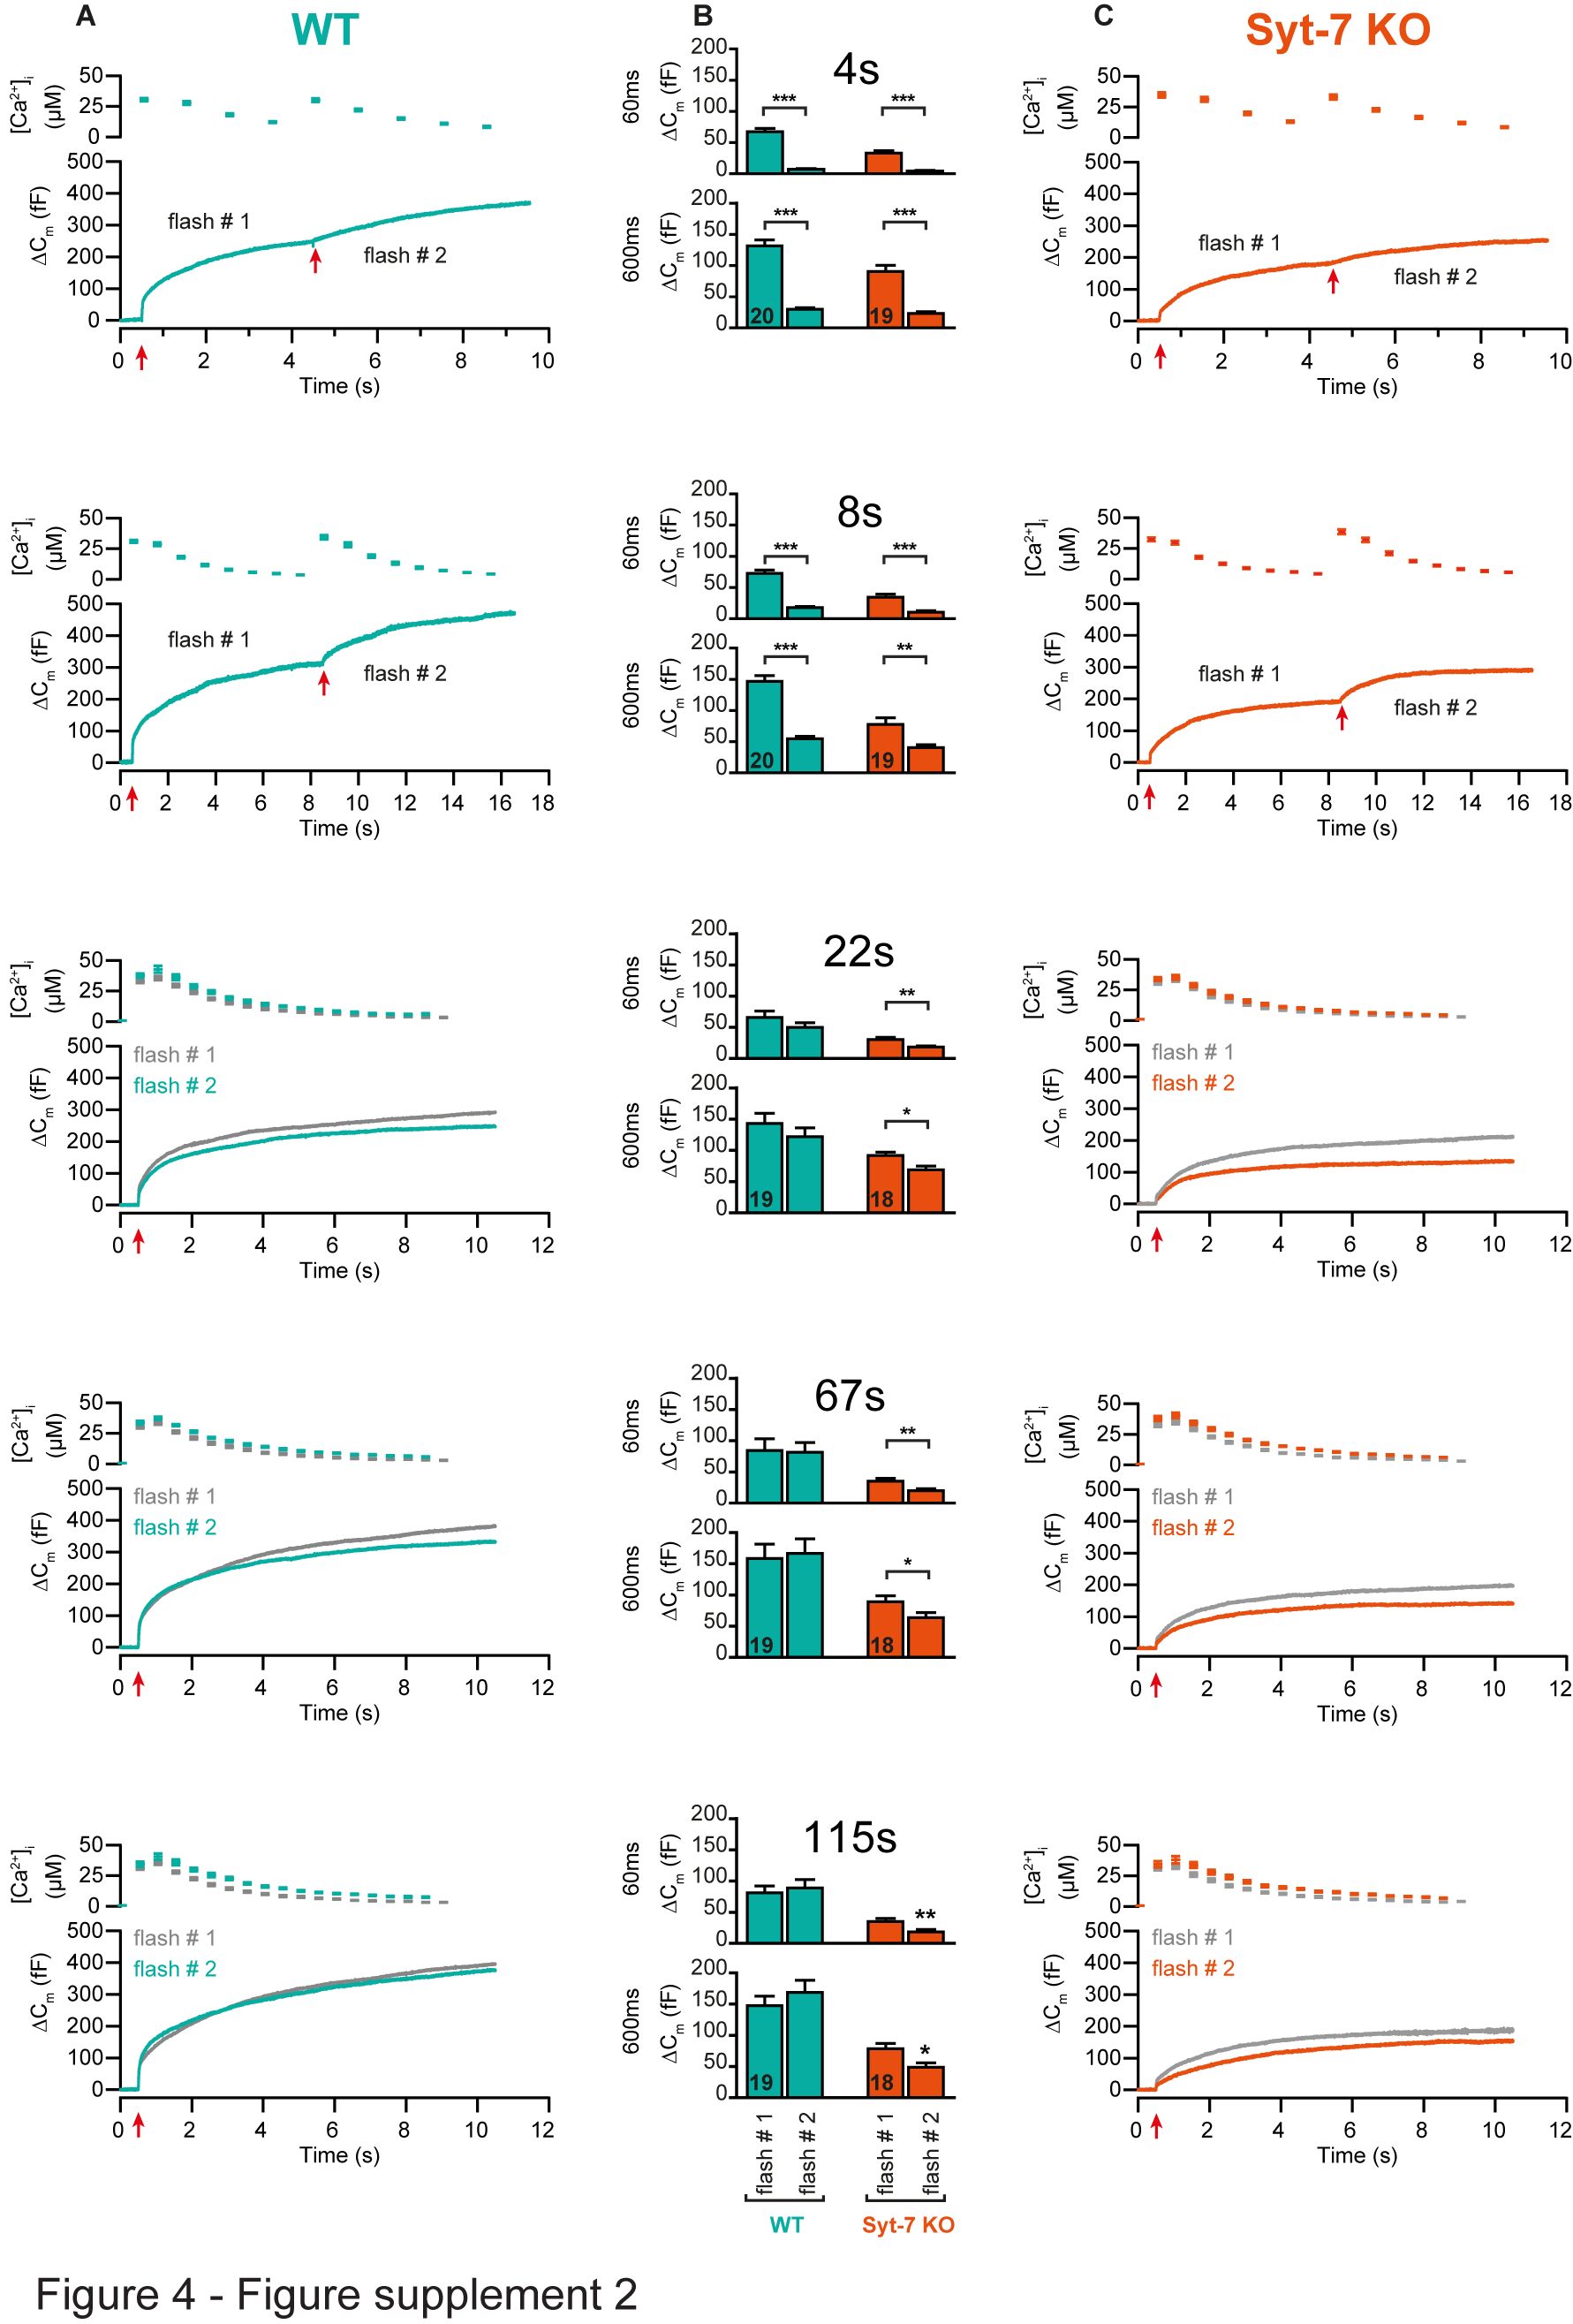

Supplement: supp [file elife-64527-supp-v1.zip › elife_poa_e64527_Figure_4_figure_supplement_2.tif]

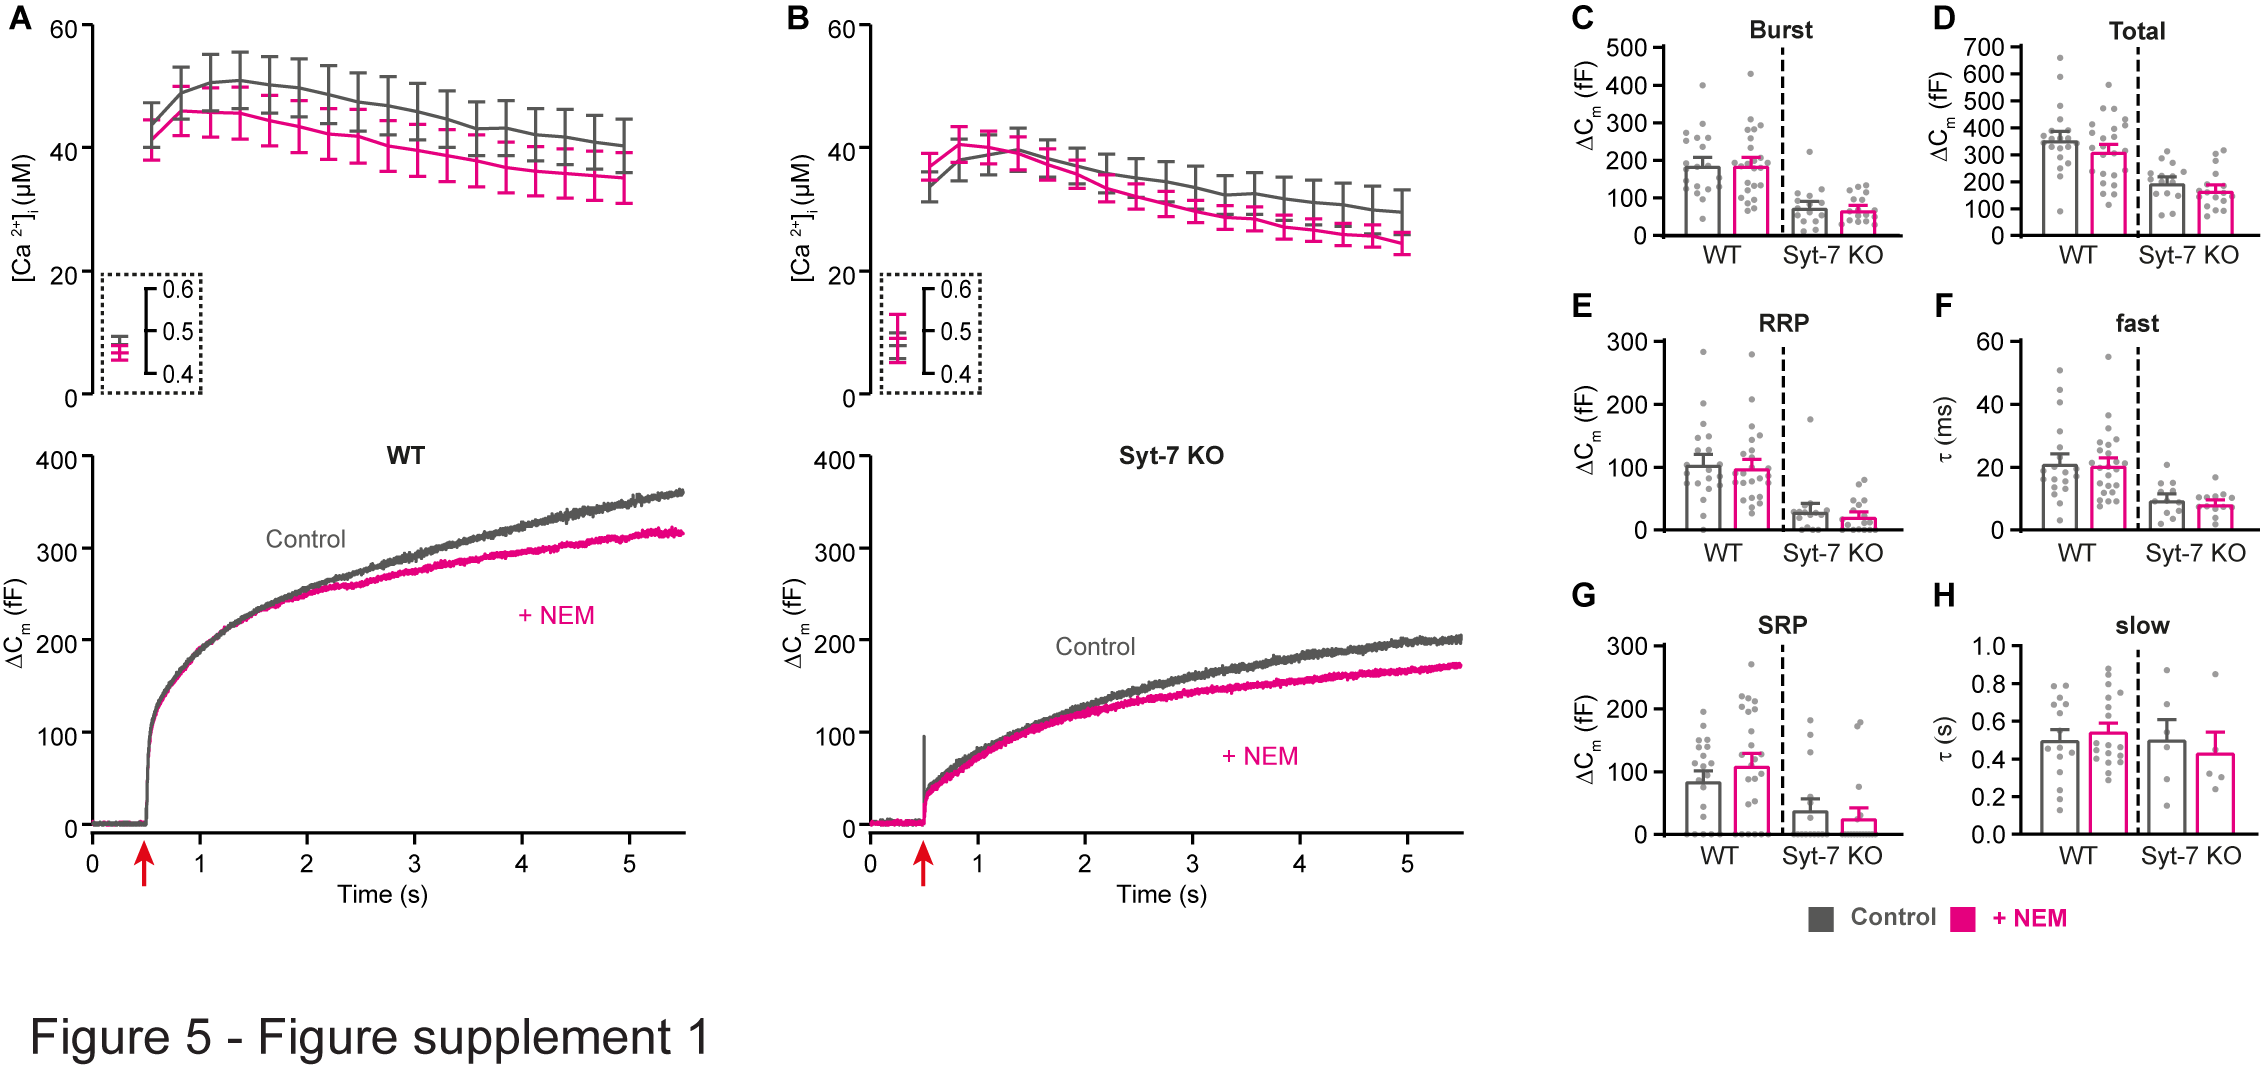

Supplement: supp [file elife-64527-supp-v1.zip › elife_poa_e64527_Figure_5_figure_supplement_1.tif]

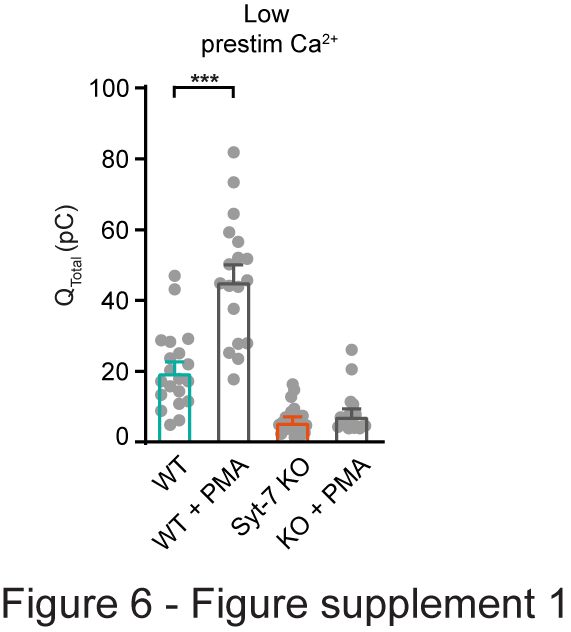

Supplement: supp [file elife-64527-supp-v1.zip › elife_poa_e64527_Figure_6_figure_supplement_1.tif]

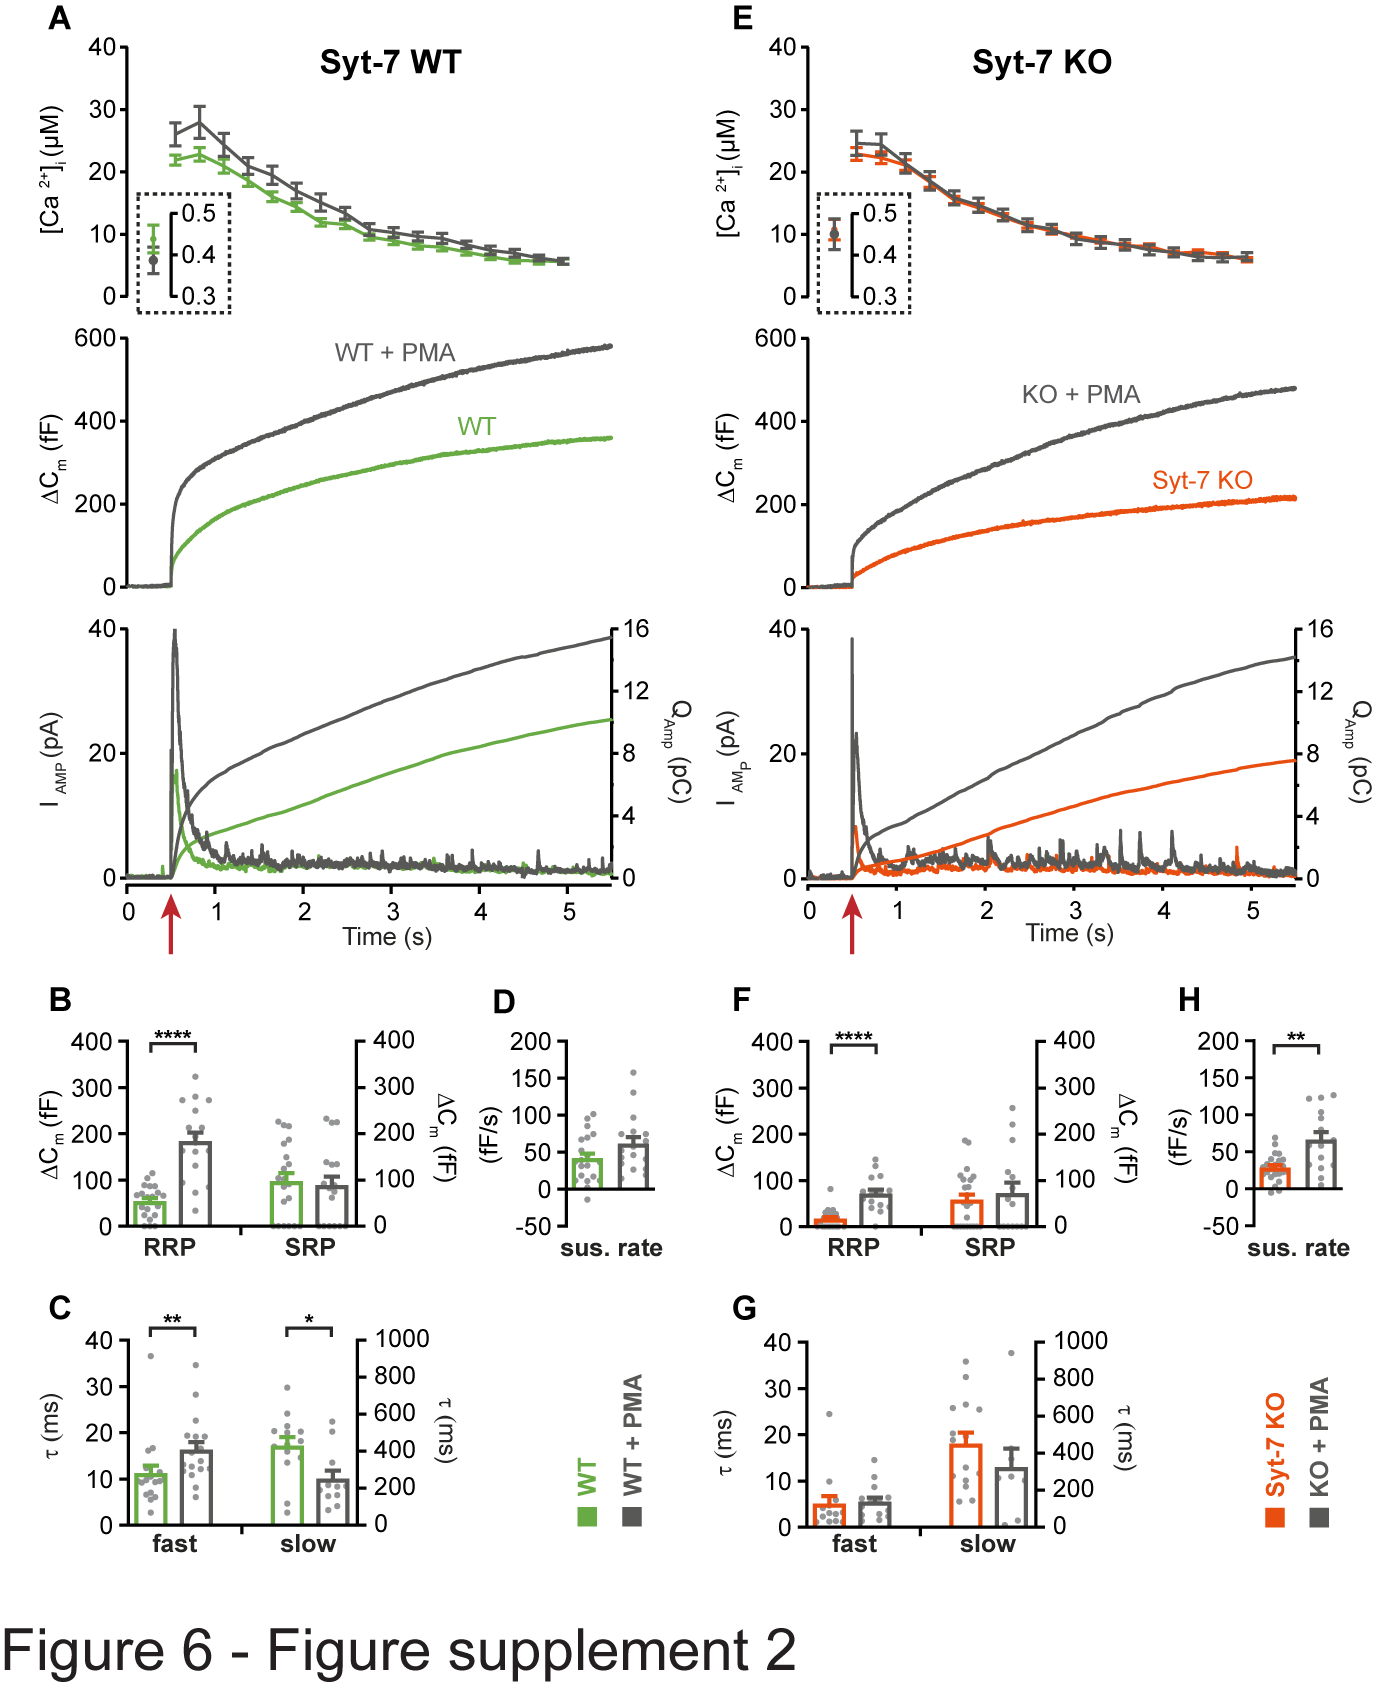

Supplement: supp [file elife-64527-supp-v1.zip › elife_poa_e64527_Figure_6_figure_supplement_2.tif]

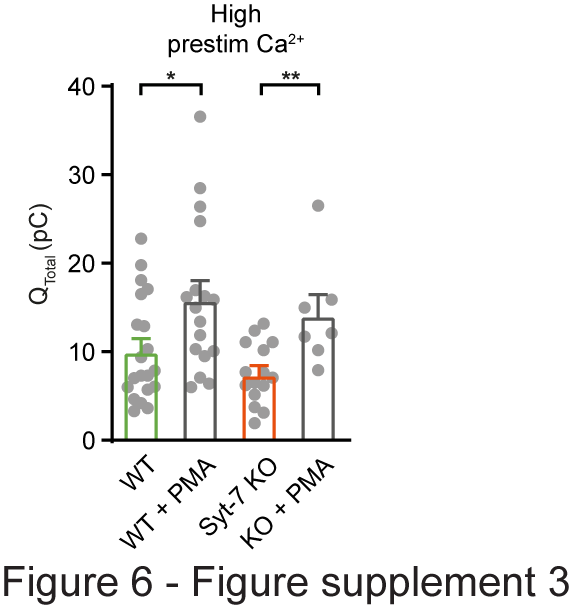

Supplement: supp [file elife-64527-supp-v1.zip › elife_poa_e64527_Figure_6_figure_supplement_3.tif]

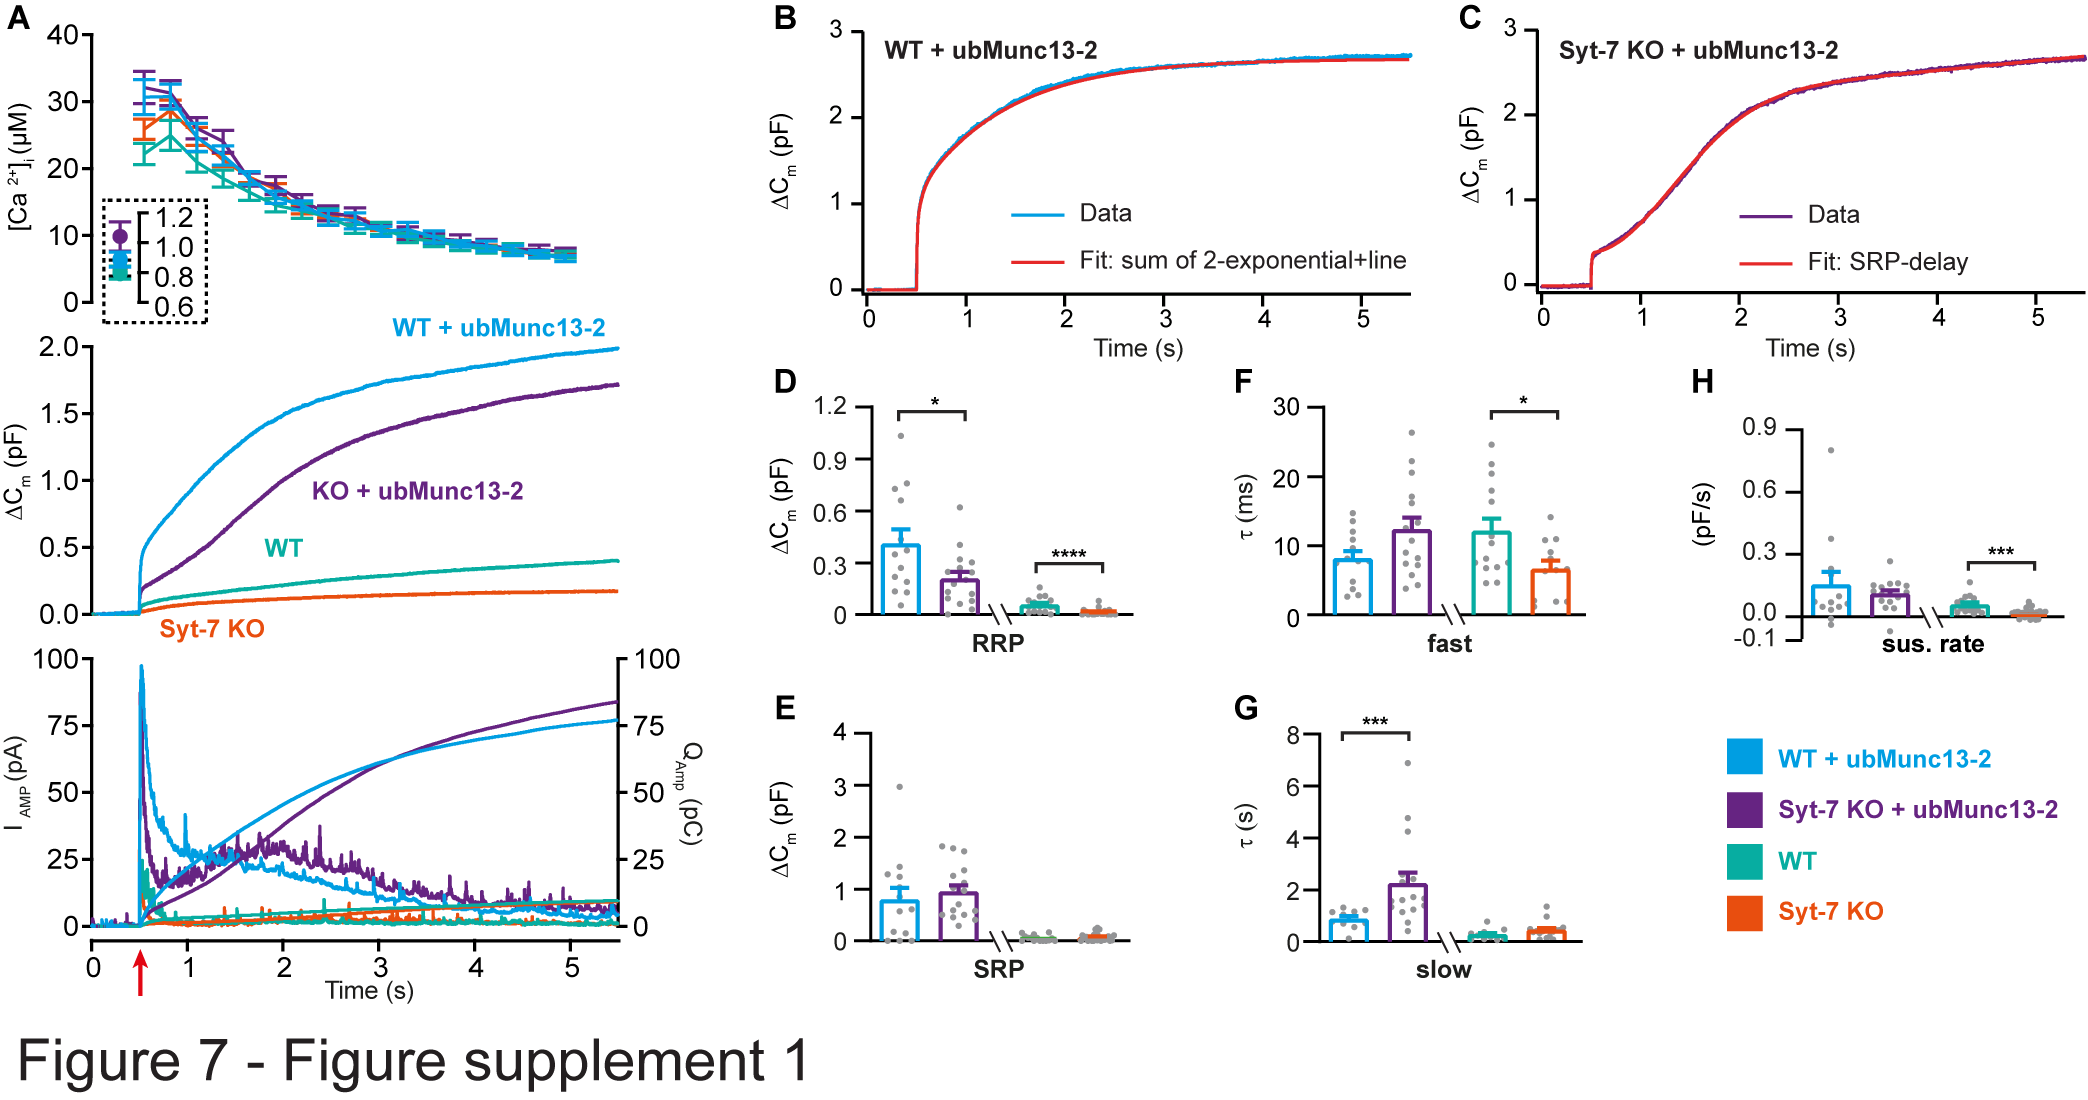

Supplement: supp [file elife-64527-supp-v1.zip › elife_poa_e64527_Figure_7_figure_supplement_1.tif]

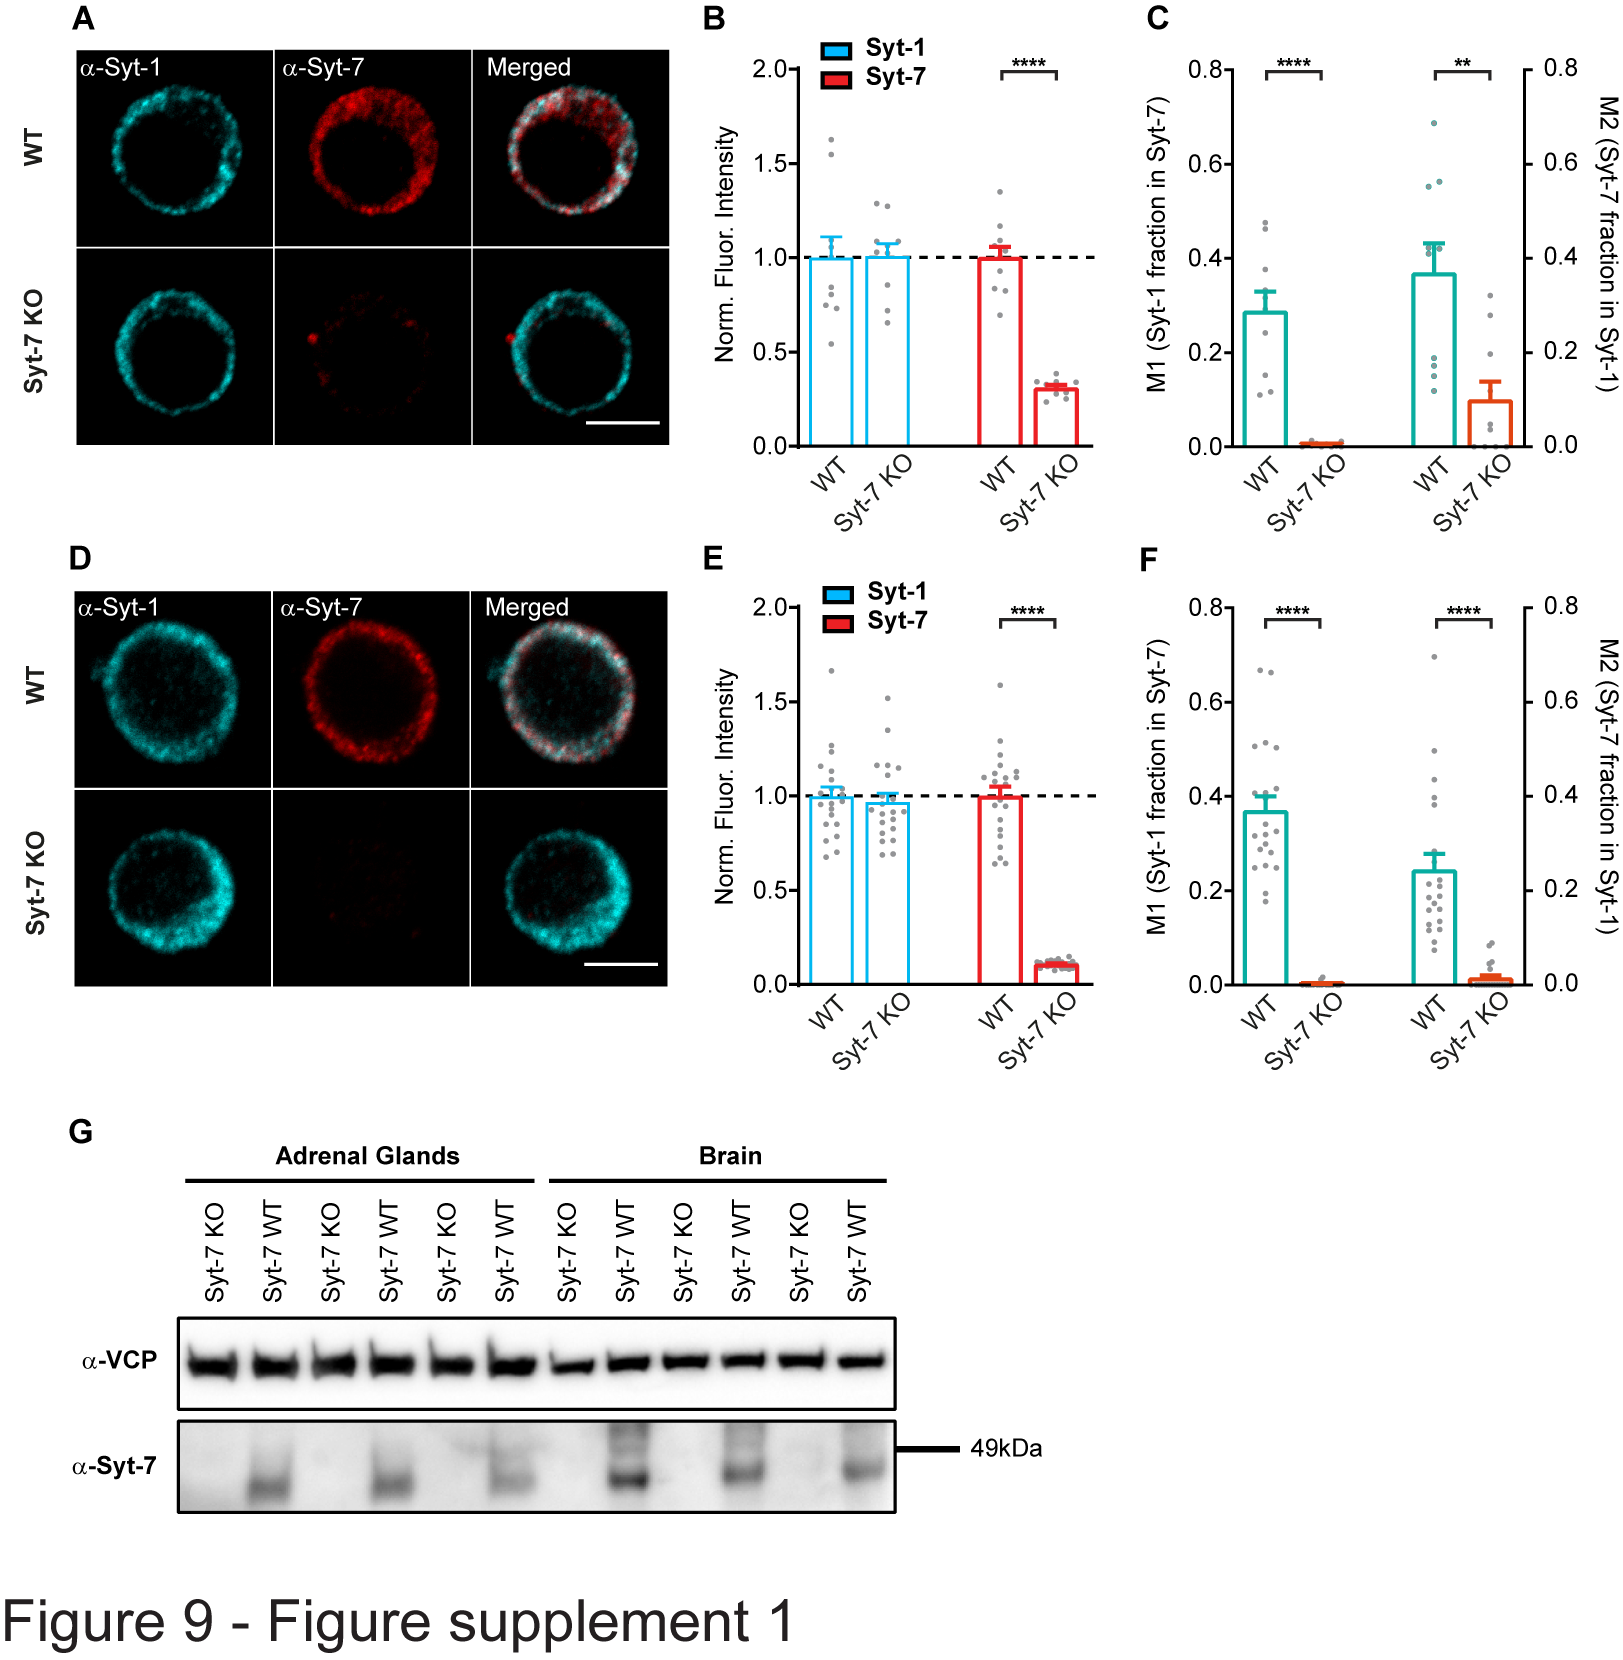

Supplement: supp [file elife-64527-supp-v1.zip › elife_poa_e64527_Figure_9_figure_supplement_1.tif]

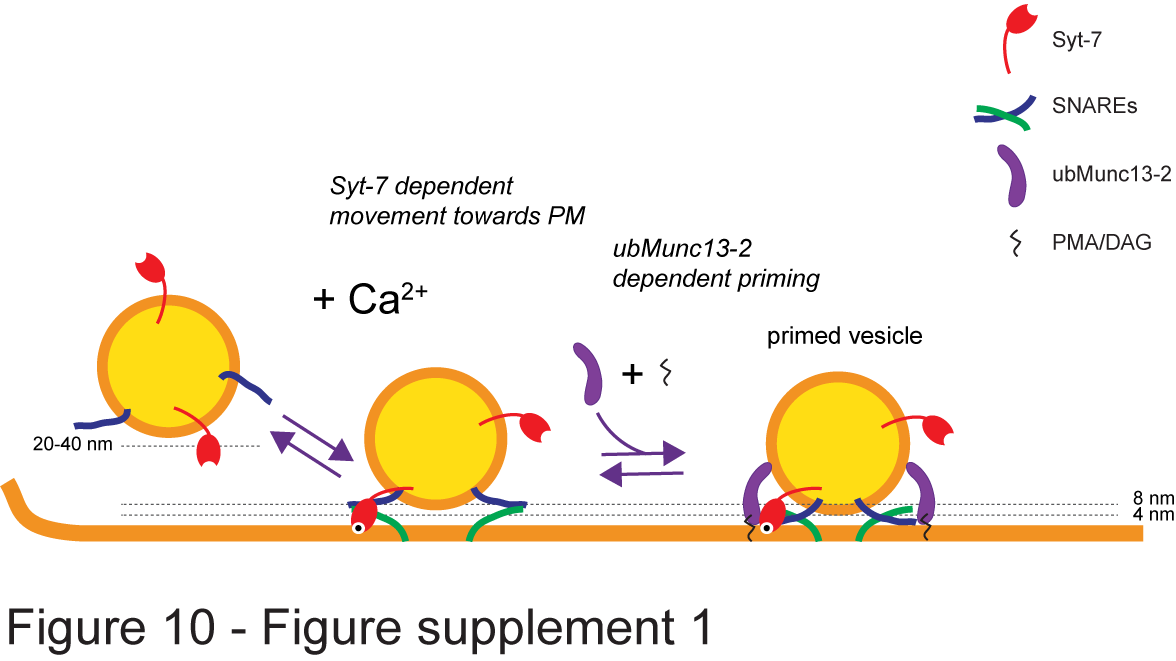

Supplement: supp [file elife-64527-supp-v1.zip › elife_poa_e64527_Figure_10_figure_supplement_1.tif]
